# Supplementary material for: The Effects of Castration, Implant Protocol, and Supplementation of Bos indicus-Influenced Beef Cattle under Tropical Savanna Conditions on Growth Performance, Carcass Characteristics, and Meat Quality
Source: MDPI journal article supplement (doi:10.3390/ani12030366), 2022-02-02
Supplement: s1 [file s1]

**Table S1.** Experimental design indicating the distribution of observations (n) by breed type, implant protocol, and supplementation treatment for the sample of grazing bulls (Experiment I).

| Breed type                      | ZER-ZER <sup>a</sup> |                 | TBA/E2-ZER <sup>b</sup> |                 | Total |
|---------------------------------|----------------------|-----------------|-------------------------|-----------------|-------|
|                                 | SS <sup>c</sup>      | MS <sup>d</sup> | SS <sup>c</sup>         | MS <sup>d</sup> |       |
| Brahman                         | 3                    | 3               | 3                       | 3               | 12    |
| F1-Angus                        | 3                    | 4               | 3                       | 6               | 16    |
| F1-Romosinuano                  | 3                    | 5               | 3                       | 5               | 16    |
| F1-Senepol                      | 4                    | 5               | 2                       | 5               | 16    |
| F1-Simmental                    | 4                    | 5               | 3                       | 5               | 17    |
| Brahman cross                   | 2                    | 3               | 4                       | 3               | 12    |
| $\frac{3}{4}$ <i>Bos taurus</i> | 3                    | 3               | 2                       | 2               | 10    |
| Total                           | 22                   | 28              | 20                      | 29              | 99    |

Source: Huerta-Leidenz *et al.* [35].

<sup>a</sup> ZER-ZER: corresponds to a dose of (72 mg) zeranol at day 0 followed by a second dose of 72 mg of zeranol at d-90;

<sup>b</sup> TBA/E2-ZER: corresponds to a first dose containing 140 mg trenbolone acetate + 20 mg estradiol 17 $\beta$  at d-0, followed by a second dose of (72 mg) of zeranol at d-90.

<sup>c</sup> Supplementation treatment: SS: strategic supplementation (SS); <sup>d</sup> MS: mineral supplementation as a control treatment.

**Table S2.** Composition of the forage supplements used in Experiment I.

| Composition            | Supplement (SS) <sup>1</sup> |                   |         |
|------------------------|------------------------------|-------------------|---------|
|                        | Strategic-Phase 1            | Strategic-Phase 2 | Mineral |
| Ingredient, % DM basis |                              |                   |         |
| Feather meal           | 10.0                         | 10.0              | -       |
| Whole cottonseed       | 0.00                         | 49.9              |         |
| Rice polish            | 77.0                         | 27.1              |         |
| Cane molasses          | 5.0                          | 5.0               |         |
| Mineral premix         | 7.0                          | 7.0               |         |
| Ionophore <sup>2</sup> | 1.0                          | 1.0               |         |
| Nutrient               |                              |                   |         |
| ME, kcal/kg            | 2.514                        | 2.809             |         |
| CP, %                  | 17.78                        | 25.82             |         |
| P, %                   | 1.07                         | 0.79              | 12.0    |
| Ca, %                  | 0.12                         | 0.17              | 24.0    |
| Mg, %                  |                              |                   | 1.5     |
| S, %                   |                              |                   | 1.0     |
| Mn, %                  |                              |                   | 0.50    |
| Zn, %                  |                              |                   | 0.75    |
| Fe, %                  |                              |                   | 0.50    |
| Cu, %                  |                              |                   | 0.20    |
| Co, %                  |                              |                   | 0.004   |
| I, %                   |                              |                   | 0.02    |
| Se, %                  |                              |                   | 0.004   |

Source: Huerta-Leidenz *et al.* [35]

<sup>1</sup>Strategic supplement-Phase 1 was supplied in the first 60 days of the trial; Strategic supplement-Phase 2 was administered manually from day 60 to day 182 (122 days in total) at a rate of 1 kg/animal/day. The mineral supplement was offered to the control (MS) group throughout the test with free access (80 g/animal/day). <sup>2</sup>Salocin® was used as the ionophore.
